# Supplementary material
Source: publisher figshare collection journal article supplement (https://sage.figshare.com/ndownloader/files/12143903)
Supplement: Supplementary file 1 [file 12143903]

# Supplementary Appendix

39

## Table A1: Balance Statistics—All Scandals

- - 1. Before Matching (2) After Matching

| MeanTR | | MeanCO | p-value | KS p-value | MeanTR | MeanCO | p-value | KS p-value |
| --- | --- | --- | --- | --- | --- | --- | --- | --- |
| Vote percentage | 72.61 | 70.53 | .14 | .09 | 72.61 | 71.62 | .17 | .18 |
| DW-NOMINATE | -.06 | -.01 | .29 | .08 | -.06 | -.07 | .34 | .71 |
| Seniority | 6.69 | 5.02 | .00 | .00 | 6.69 | 6.46 | .08 | .98 |
| Legislative effectiveness | 1.77 | .96 | .01 | .01 | 1.77 | 1.43 | .08 | .71 |
| District presidential vote | 53.99 | 50.16 | .02 | .09 | 53.99 | 52.71 | .18 | .44 |
| Democrat (exact) | .60 | .55 | .32 | NA | .60 | .60 | 1 | NA |
| Female (exact) | .09 | .11 | .44 | NA | .09 | .09 | 1 | NA |
| Pre-scandal funds raised | 11.29 | 11.14 | .68 | .62 | 11.29 | 11.24 | .49 | .15 |
| Break date (exact) | 41.89 | 43.17 | .61 | .76 | 41.89 | 41.89 | 1 | 1 |
| *Challenger quality* | *.14* | *.14* | *.86* | *NA* | *.14* | *.12* | *.77* | *NA* |

Table A2: Balance Statistics—Covered Scandals

(1) Before Matching (2) After Matching

| MeanTR | | MeanCO | p-value | KS p-value | MeanTR | MeanCO | p-value | KS p-value |
| --- | --- | --- | --- | --- | --- | --- | --- | --- |
| Vote percentage | 70.81 | 70.71 | .96 | .53 | 70.81 | 71.09 | .83 | .29 |
| DW-NOMINATE | -.14 | -.01 | .04 | .00 | -.14 | -.13 | .42 | .19 |
| Seniority | 6.57 | 5.08 | .01 | .00 | 6.57 | 6.42 | .22 | .99 |
| Legislative effectiveness | 2.42 | .98 | .01 | .02 | 2.42 | 1.87 | .19 | .67 |
| District presidential vote | 57.11 | 49.87 | .00 | .05 | 57.11 | 55.69 | .17 | .29 |
| Democrat (exact) | .66 | .56 | .14 | NA | .66 | .66 | 1 | NA |
| Female (exact) | .10 | .11 | .95 | NA | .10 | .10 | 1 | NA |
| Pre-scandal funds raised | 11.71 | 11.44 | .52 | .93 | 11.71 | 11.69 | .90 | .77 |
| Break date (exact) | 39.69 | 43.09 | .35 | .31 | 39.69 | 39.69 | 1 | 1 |
| *Challenger quality* | *.16* | *.15* | *.85* | *NA* | *.16* | *.13* | *.68* | *NA* |

40

Table A3: Balance Statistics—Non-Covered Scandals

(1) Before Matching (2) After Matching

| MeanTR | | MeanCO | p-value | KS p-value | MeanTR | MeanCO | p-value | KS p-value |
| --- | --- | --- | --- | --- | --- | --- | --- | --- |
| Vote percentage | 74.93 | 70.35 | .04 | .11 | 74.93 | 73.56 | .18 | .75 |
| DW-NOMINATE | .05 | -.01 | .39 | .71 | .05 | .-.00 | .15 | .52 |
| Seniority | 6.84 | 4.96 | .01 | .02 | 6.84 | 6.52 | .13 | .91 |
| Legislative effectiveness | .93 | .95 | .89 | .45 | .93 | .89 | .58 | .41 |
| District presidential vote | 49.99 | 50.45 | .82 | .69 | 49.99 | 50.88 | .65 | .15 |
| Democrat (exact) | .53 | .55 | .86 | NA | .53 | .53 | 1 | NA |
| Female (exact) | .07 | .11 | .24 | NA | .07 | .07 | 1 | NA |
| Pre-scandal funds raised | 10.76 | 10.83 | .91 | .24 | 10.76 | 10.55 | .16 | .13 |
| Break date (exact) | 44.73 | 43.25 | .67 | 1 | 44.73 | 44.73 | 1 | 1 |
| *Challenger quality* | *.11* | *.14* | *.56* | *NA* | *.11* | *.09* | *.72* | *NA* |

Table A4: Balance Statistics—All Financial Scandals

(1) Before Matching (2) After Matching

| MeanTR | | MeanCO | p-value | KS p-value | MeanTR | MeanCO | p-value | KS p-value |
| --- | --- | --- | --- | --- | --- | --- | --- | --- |
| Vote percentage | 75.57 | 70.43 | .01 | .00 | 75.57 | 74.65 | .31 | .18 |
| DW-NOMINATE | -.09 | -.00 | .08 | .06 | -.09 | -.12 | .36 | .75 |
| Seniority | 7.51 | 5.18 | .00 | .00 | 7.51 | 7.32 | .27 | .93 |
| Legislative effectiveness | 2.07 | .96 | .02 | .00 | 2.07 | 1.65 | .23 | .74 |
| District presidential vote | 56.77 | 50.19 | .00 | .04 | 56.77 | 55.29 | .23 | .74 |
| Democrat (exact) | .66 | .56 | .08 | NA | .66 | .66 | 1 | NA |
| Female (exact) | .12 | .12 | .89 | NA | .12 | .12 | 1 | NA |
| Pre-scandal funds raised | 11.19 | 11.22 | .96 | .97 | 11.19 | 11.09 | .34 | .19 |
| Break date (exact) | 45.8 | 48.51 | .42 | .39 | 45.8 | 45.8 | 1 | 1 |
| *Challenger quality* | *.12* | *.14* | *.64* | *NA* | *.12* | *.11* | *.85* | *NA* |

41

Table A5: Balance Statistics—Covered Financial Scandals

(1) Before Matching (2) After Matching

| MeanTR | | MeanCO | p-value | KS p-value | MeanTR | MeanCO | p-value | KS p-value |
| --- | --- | --- | --- | --- | --- | --- | --- | --- |
| Vote percentage | 75 | 70.71 | .09 | .04 | 75 | 73.99 | .42 | .13 |
| DW-NOMINATE | -.21 | .01 | .00 | .01 | -.21 | -.19 | .31 | .21 |
| Seniority | 7.66 | 5.39 | .01 | .00 | 7.66 | 7.44 | .30 | .99 |
| Legislative effectiveness | 2.97 | .97 | .02 | .01 | 2.97 | 1.99 | .13 | .56 |
| District presidential vote | 61.82 | 51.35 | .00 | .02 | 61.82 | 59.92 | .15 | .29 |
| Democrat (exact) | .71 | .56 | .06 | NA | .71 | .71 | 1 | NA |
| Female (exact) | .14 | .13 | .87 | NA | .14 | .14 | 1 | NA |
| Pre-scandal funds raised | 12.06 | 12.26 | .67 | .32 | 12.06 | 12.12 | .76 | .68 |
| Break date (exact) | 46.57 | 57.08 | .04 | .01 | 46.57 | 46.57 | 1 | 1 |
| *Challenger quality* | *.14* | *.15* | *.87* | *NA* | *.14* | *.13* | *.90* | *NA* |

Table A6: Balance Statistics—Non-Covered Financial Scandals

(1) Before Matching (2) After Matching

| MeanTR | | MeanCO | p-value | KS p-value | MeanTR | MeanCO | p-value | KS p-value |
| --- | --- | --- | --- | --- | --- | --- | --- | --- |
| Vote percentage | 76.23 | 70.23 | .05 | .10 | 76.23 | 74.71 | .22 | .40 |
| DW-NOMINATE | .03 | -.01 | .67 | .87 | .03 | -.03 | .17 | .19 |
| Seniority | 7.33 | 5.03 | .01 | .06 | 7.33 | 6.94 | .19 | .96 |
| Legislative effectiveness | 1.02 | .95 | .68 | .10 | 1.02 | .97 | .49 | .61 |
| District presidential vote | 50.87 | 49.36 | .53 | .35 | 50.87 | 51.77 | .60 | .46 |
| Democrat (exact) | .6 | .55 | .61 | NA | .6 | .6 | 1 | NA |
| Female (exact) | .1 | .11 | .89 | NA | .1 | .1 | 1 | NA |
| Pre-scandal funds raised | 10.19 | 10.47 | .75 | .31 | 10.19 | 10.37 | .71 | .20 |
| Break date (exact) | 44.9 | 42.38 | .58 | .99 | 44.9 | 44.9 | 1 | 1 |
| *Challenger quality* | *.1* | *.13* | *.54* | *NA* | *.1* | *.08* | *.77* | *NA* |

42

Table A7: Balance Statistics—All Sex Scandals

(1) Before Matching (2) After Matching

| MeanTR | | MeanCO | p-value | KS p-value | MeanTR | MeanCO | p-value | KS p-value |
| --- | --- | --- | --- | --- | --- | --- | --- | --- |
| Vote percentage | 67.47 | 70.81 | .25 | .55 | 67.47 | 66.98 | .68 | .58 |
| DW-NOMINATE | .25 | -.02 | .03 | .01 | .25 | .25 | .96 | .51 |
| Seniority | 4.65 | 4.74 | .89 | .69 | 4.65 | 4.51 | .61 | .64 |
| Legislative effectiveness | 1.55 | .98 | .29 | .70 | 1.55 | 1.46 | .54 | .83 |
| District presidential vote | 45.08 | 50.73 | .08 | .01 | 45.08 | 45.57 | .69 | .49 |
| Democrat (exact) | .24 | .55 | .01 | NA | .24 | .24 | 1 | NA |
| Female (exact) | .06 | .09 | .63 | NA | .06 | .06 | 1 | NA |
| Pre-scandal funds raised | 11.06 | 10.67 | .65 | .69 | 11.06 | 11.17 | .77 | .49 |
| Break date (exact) | 30.82 | 32.37 | .74 | .99 | 30.82 | 30.82 | 1 | 1 |
| *Challenger quality* | *.24* | *.14* | *.39* | *NA* | *.24* | *.16* | *.42* | *NA* |

Table A8: Balance Statistics—Covered Sex Scandals

(1) Before Matching (2) After Matching

| MeanTR | | MeanCO | p-value | KS p-value | MeanTR | MeanCO | p-value | KS p-value |
| --- | --- | --- | --- | --- | --- | --- | --- | --- |
| Vote percentage | 64.36 | 70.56 | .06 | .29 | 64.36 | 65.21 | .41 | .89 |
| DW-NOMINATE | .16 | -.03 | .29 | .09 | .16 | .13 | .69 | .39 |
| Seniority | 3.91 | 4.65 | .42 | .80 | 3.91 | 4.61 | .43 | .61 |
| Legislative effectiveness | 1.81 | .99 | .26 | .19 | 1.81 | 1.60 | .43 | .79 |
| District presidential vote | 48.14 | 49.88 | .69 | .29 | 48.14 | 48.39 | .82 | .77 |
| Democrat (exact) | .36 | .56 | .23 | NA | .36 | .36 | 1 | NA |
| Female (exact) | .09 | .07 | .82 | NA | .09 | .09 | 1 | NA |
| Pre-scandal funds raised | 10.05 | 9.89 | .90 | .86 | 10.05 | 10.07 | .98 | .78 |
| Break date (exact) | 24.64 | 26.24 | .78 | .99 | 24.64 | 24.64 | 1 | 1 |
| *Challenger quality* | *.27* | *.14* | *.37* | *NA* | *.27* | *.21* | *.64* | *NA* |

43

Table A9: Balance Statistics—Non-Covered Sex Scandals

(1) Before Matching (2) After Matching

| MeanTR | | MeanCO | p-value | KS p-value | MeanTR | MeanCO | p-value | KS p-value |
| --- | --- | --- | --- | --- | --- | --- | --- | --- |
| Vote percentage | 73.17 | 71.23 | .73 | .56 | 73.17 | 70 | .69 | .38 |
| DW-NOMINATE | .41 | -.00 | .00 | .01 | .41 | .40 | .85 | .66 |
| Seniority | 6 | 4.89 | .34 | .32 | 6 | 5.83 | .74 | .98 |
| Legislative effectiveness | 1.07 | .95 | .89 | .37 | 1.07 | 1.06 | .93 | .39 |
| District presidential vote | 39.48 | 52.12 | .01 | .03 | 39.48 | 42.65 | .45 | .41 |
| Democrat (exact) | 0 | .53 | .00 | NA | 0 | 0 | 1 | NA |
| Female (exact) | 0 | .12 | .00 | NA | 0 | 0 | 1 | NA |
| Pre-scandal funds raised | 12.91 | 11.94 | .06 | .18 | 12.91 | 12.74 | .44 | .4 |
| Break date (exact) | 42.17 | 42.52 | .95 | .99 | 42.17 | 42.17 | 1 | 1 |
| *Challenger quality* | *.17* | *.14* | *.88* | *NA* | *.17* | *.22* | *.84* | *NA* |

Table A10: Balance Statistics—All Political Scandals

(1) Before Matching (2) After Matching

| MeanTR | | MeanCO | p-value | KS p-value | MeanTR | MeanCO | p-value | KS p-value |
| --- | --- | --- | --- | --- | --- | --- | --- | --- |
| Vote percentage | 70.63 | 69.85 | .80 | .29 | 70.63 | 70.88 | .93 | .34 |
| DW-NOMINATE | .03 | .00 | .92 | .20 | .03 | .06 | .38 | .21 |
| Seniority | 7.38 | 4.90 | .23 | .07 | 7.38 | 6.88 | .41 | .92 |
| Legislative effectiveness | .43 | .93 | .00 | .39 | .43 | .47 | .79 | .36 |
| District presidential vote | 53.01 | 52.56 | .96 | .37 | 53.01 | 54.06 | .64 | .59 |
| Democrat (exact) | .38 | .53 | .44 | NA | .38 | .38 | 1 | NA |
| Female (exact) | 0 | .13 | .00 | NA | 0 | 0 | 1 | NA |
| Pre-scandal funds raised | 13.28 | 13.03 | .47 | .59 | 13.28 | 13.19 | .72 | .39 |
| Break date (exact) | 47.5 | 48.53 | .82 | .99 | 47.5 | 47.5 | 1 | 1 |
| *Challenger quality* | *.13* | *.14* | *.90* | *NA* | *.13* | *.04* | *.57* | *NA* |

44

Table A11: Balance Statistics—Covered Political Scandals

(1) Before Matching (2) After Matching

| MeanTR | | MeanCO | p-value | KS p-value | MeanTR | MeanCO | p-value | KS p-value |
| --- | --- | --- | --- | --- | --- | --- | --- | --- |
| Vote percentage | 64.67 | 69.33 | .40 | .77 | 64.67 | 69.33 | .42 | .24 |
| DW-NOMINATE | .06 | .00 | .91 | .69 | .06 | .13 | .38 | .57 |
| Seniority | 7.33 | 5.07 | .12 | .05 | 7.33 | 7.33 | 1 | .46 |
| Legislative effectiveness | .32 | .97 | .05 | .59 | .32 | 1.33 | .38 | .55 |
| District presidential vote | 48.00 | 52.05 | .81 | .18 | 48.00 | 48.24 | .95 | .25 |
| Democrat (exact) | .33 | .53 | .61 | NA | .33 | .33 | 1 | NA |
| Female (exact) | 0 | .13 | .00 | NA | 0 | 0 | 1 | NA |
| Pre-scandal funds raised | 13.72 | 13.10 | .38 | .18 | 13.72 | 13.75 | .91 | .57 |
| Break date (exact) | 45.67 | 46.79 | .89 | .89 | 45.67 | 45.67 | 1 | 1 |
| *Challenger quality* | *.33* | *.13* | *.61* | *NA* | *.33* | *.11* | *.45* | *NA* |

Table A12: Balance Statistics—Non-Covered Political Scandals

(1) Before Matching (2) After Matching

| MeanTR | | MeanCO | p-value | KS p-value | MeanTR | MeanCO | p-value | KS p-value |
| --- | --- | --- | --- | --- | --- | --- | --- | --- |
| Vote percentage | 74.2 | 70.18 | .29 | .14 | 74.2 | 72.93 | .59 | .79 |
| DW-NOMINATE | .01 | .00 | .98 | .36 | .01 | .02 | .92 | .56 |
| Seniority | 7.4 | 4.79 | .45 | .74 | 7.4 | 6.87 | .57 | .79 |
| Legislative effectiveness | .49 | .91 | .02 | .58 | .49 | .43 | .75 | .29 |
| District presidential vote | 56.01 | 52.89 | .78 | .53 | 56.01 | 57.18 | .74 | .86 |
| Democrat (exact) | .4 | .52 | .65 | NA | .4 | .4 | 1 | NA |
| Female (exact) | 0 | .13 | .00 | NA | 0 | 0 | 1 | NA |
| Pre-scandal funds raised | 13.02 | 12.99 | .94 | .87 | 13.02 | 13.12 | .63 | .55 |
| Break date (exact) | 48.6 | 49.61 | .88 | .98 | 48.6 | 48.6 | 1 | 1 |
| *Challenger quality* | *0* | *.15* | *.00* | *NA* | *0* | *.07* | *.58* | *NA* |

45

Table A13: Balance Statistics—All Other Scandals

(1) Before Matching (2) After Matching

| MeanTR | | MeanCO | p-value | KS p-value | MeanTR | MeanCO | p-value | KS p-value |
| --- | --- | --- | --- | --- | --- | --- | --- | --- |
| Vote percentage | 67.71 | 70.89 | .41 | .29 | 67.71 | 67.55 | .90 | .66 |
| DW-NOMINATE | -.25 | -.02 | .03 | .05 | -.25 | -.25 | .85 | .72 |
| Seniority | 4.71 | 4.87 | .85 | .73 | 4.71 | 4.71 | 1 | .71 |
| Legislative effectiveness | 1.31 | .97 | .66 | .73 | 1.31 | 1.10 | .61 | .72 |
| District presidential vote | 51.52 | 48.15 | .28 | .12 | 51.52 | 51.49 | .98 | .89 |
| Democrat (exact) | .86 | .56 | .01 | NA | .86 | .86 | 1 | NA |
| Female (exact) | 0 | .09 | .00 | NA | 0 | 0 | 1 | NA |
| Pre-scandal funds raised | 10.93 | 10.39 | .59 | .60 | 10.93 | 10.86 | .62 | .88 |
| Break date (exact) | 35.21 | 35.57 | .96 | 1 | 35.21 | 35.21 | 1 | 1 |
| *Challenger quality* | *.07* | *.14* | *.33* | *NA* | *.07* | *.14* | *.52* | *NA* |

Table A14: Balance Statistics—Covered “Other” Scandals

(1) Before Matching (2) After Matching

| MeanTR | | MeanCO | p-value | KS p-value | MeanTR | MeanCO | p-value | KS p-value |
| --- | --- | --- | --- | --- | --- | --- | --- | --- |
| Vote percentage | 64.44 | 71.29 | .08 | .22 | 64.44 | 65.11 | .73 | .61 |
| DW-NOMINATE | -.33 | -.03 | .04 | .09 | -.33 | -.33 | .76 | .66 |
| Seniority | 5.33 | 4.85 | .69 | .88 | 5.33 | 5.26 | .93 | .54 |
| Legislative effectiveness | 1.76 | .97 | .52 | .36 | 1.76 | 1.62 | .84 | .66 |
| District presidential vote | 52.75 | 45.92 | .16 | .04 | 52.75 | 52.40 | .77 | .66 |
| Democrat (exact) | .89 | .57 | .02 | NA | .89 | .89 | 1 | NA |
| Female (exact) | 0 | .08 | .00 | NA | 0 | 0 | 1 | NA |
| Pre-scandal funds raised | 11.71 | 10.82 | .31 | .86 | 11.71 | 11.64 | .73 | .67 |
| Break date (exact) | 29.33 | 29.78 | .96 | .99 | 29.33 | 29.33 | 1 | 1 |
| *Challenger quality* | *0* | *.14* | *.00* | *NA* | *0* | *.22* | *.15* | *NA* |

46

Table A15: Balance Statistics—Non-Covered “Other” Scandals

(1) Before Matching (2) After Matching

| MeanTR | | MeanCO | p-value | KS p-value | MeanTR | MeanCO | p-value | KS p-value |
| --- | --- | --- | --- | --- | --- | --- | --- | --- |
| Vote percentage | 73.6 | 70.16 | .70 | .61 | 73.6 | 73.2 | .85 | .83 |
| DW-NOMINATE | -.11 | .01 | .42 | .59 | -.11 | -.11 | .81 | .85 |
| Seniority | 3.6 | 4.91 | .16 | .29 | 3.6 | 3.53 | .94 | .40 |
| Legislative effectiveness | .49 | .97 | .09 | .50 | .49 | .53 | .73 | .56 |
| District presidential vote | 49.29 | 52.30 | .38 | .60 | 49.29 | 49.52 | .89 | .56 |
| Democrat (exact) | .8 | .54 | .27 | NA | .8 | .8 | 1 | NA |
| Female (exact) | 0 | .12 | .00 | NA | 0 | 0 | 1 | NA |
| Pre-scandal funds raised | 9.54 | 9.61 | .98 | .72 | 9.54 | 9.44 | .74 | .84 |
| Break date (exact) | 45.8 | 46.34 | .97 | .98 | 45.8 | 45.8 | 1 | 1 |
| *Challenger quality* | *.2* | *.15* | *.83* | *NA* | *.2* | *.4* | *.46* | *NA* |

47

Table A16: Balance Statistics—Pre-1994 Scandals

(1) Before Matching (2) After Matching

| MeanTR | | MeanCO | p-value | KS p-value | MeanTR | MeanCO | p-value | KS p-value |
| --- | --- | --- | --- | --- | --- | --- | --- | --- |
| Vote percentage | 73.73 | 71.75 | .41 | .11 | 73.73 | 73.26 | .66 | .66 |
| DW-NOMINATE | -.17 | -.07 | .13 | .01 | -.17 | -.18 | .79 | .53 |
| Seniority | 6 | 4.82 | .03 | .01 | 6 | 5.76 | .25 | .52 |
| Legislative effectiveness | 1.89 | .99 | .06 | .07 | 1.89 | 1.49 | .22 | .62 |
| District presidential vote | 53.87 | 45.91 | .00 | .00 | 53.87 | 52.51 | .22 | .22 |
| Democrat (exact) | .73 | .61 | .08 | NA | .73 | .73 | 1 | NA |
| Female (exact) | .04 | .05 | .86 | NA | .04 | .04 | 1 | NA |
| Pre-scandal funds raised | 9.73 | 9.32 | .56 | .50 | 9.73 | 9.78 | .71 | .88 |
| Break date (exact) | 17.4 | 16.41 | .51 | .09 | 17.4 | 17.4 | 1 | 1 |
| *Challenger quality* | *.18* | *.14* | *.47* | *NA* | *.18* | *.14* | *.63* | *NA* |

48

Table A17: Balance Statistics—Post-1994 Scandals

(1) Before Matching (2) After Matching

| MeanTR | | MeanCO | p-value | KS p-value | MeanTR | MeanCO | p-value | KS p-value |
| --- | --- | --- | --- | --- | --- | --- | --- | --- |
| Vote percentage | 71.74 | 69.78 | .25 | .65 | 71.74 | 70.98 | .39 | .49 |
| DW-NOMINATE | .03 | .03 | .96 | .74 | .03 | .03 | .90 | .59 |
| Seniority | 7.22 | 5.14 | .00 | .00 | 7.22 | 6.93 | .16 | .77 |
| Legislative effectiveness | 1.68 | .95 | .09 | .08 | 1.68 | 1.43 | .19 | .91 |
| District presidential vote | 54.1 | 52.76 | .57 | .27 | 54.1 | 53.69 | .78 | .23 |
| Democrat (exact) | .5 | .52 | .79 | NA | .5 | .5 | 1 | NA |
| Female (exact) | .12 | .14 | .58 | NA | .12 | .12 | 1 | NA |
| Pre-scandal funds raised | 12.51 | 12.25 | .40 | .33 | 12.51 | 12.34 | .33 | .19 |
| Break date (exact) | 60.89 | 59.49 | .51 | .78 | 60.89 | 59.49 | 1 | 1 |
| *Challenger quality* | *.10* | *.15* | *.30* | *NA* | *.10* | *.08* | *.65* | *NA* |
